# Supplementary material
Source: PubMed Central journal article supplement (PMC9097394)
Supplement: NIHMS1803245-supplement-Supplementary_documents.pdf [file NIHMS1803245-supplement-Supplementary_documents.pdf]

1 **Supplementary materials**

2

3 **Methylation-dependent and -independent roles of EZH2 synergize in CDCA8**  
4 **activation in prostate cancer**

5

6 Yang Yi, Yanqiang Li, Chao Li, Longxiang Wu, Dongyu Zhao, Fuxi Li, Ladan Fazli,  
7 Rui Wang, Long Wang, Xuesen Dong, Wei Zhao, Kaifu Chen, Qi Cao

8

9 **Contents**

10 **Supplementary Figures 1-6**

11 **Supplementary Table 1, 4 and 5**

12

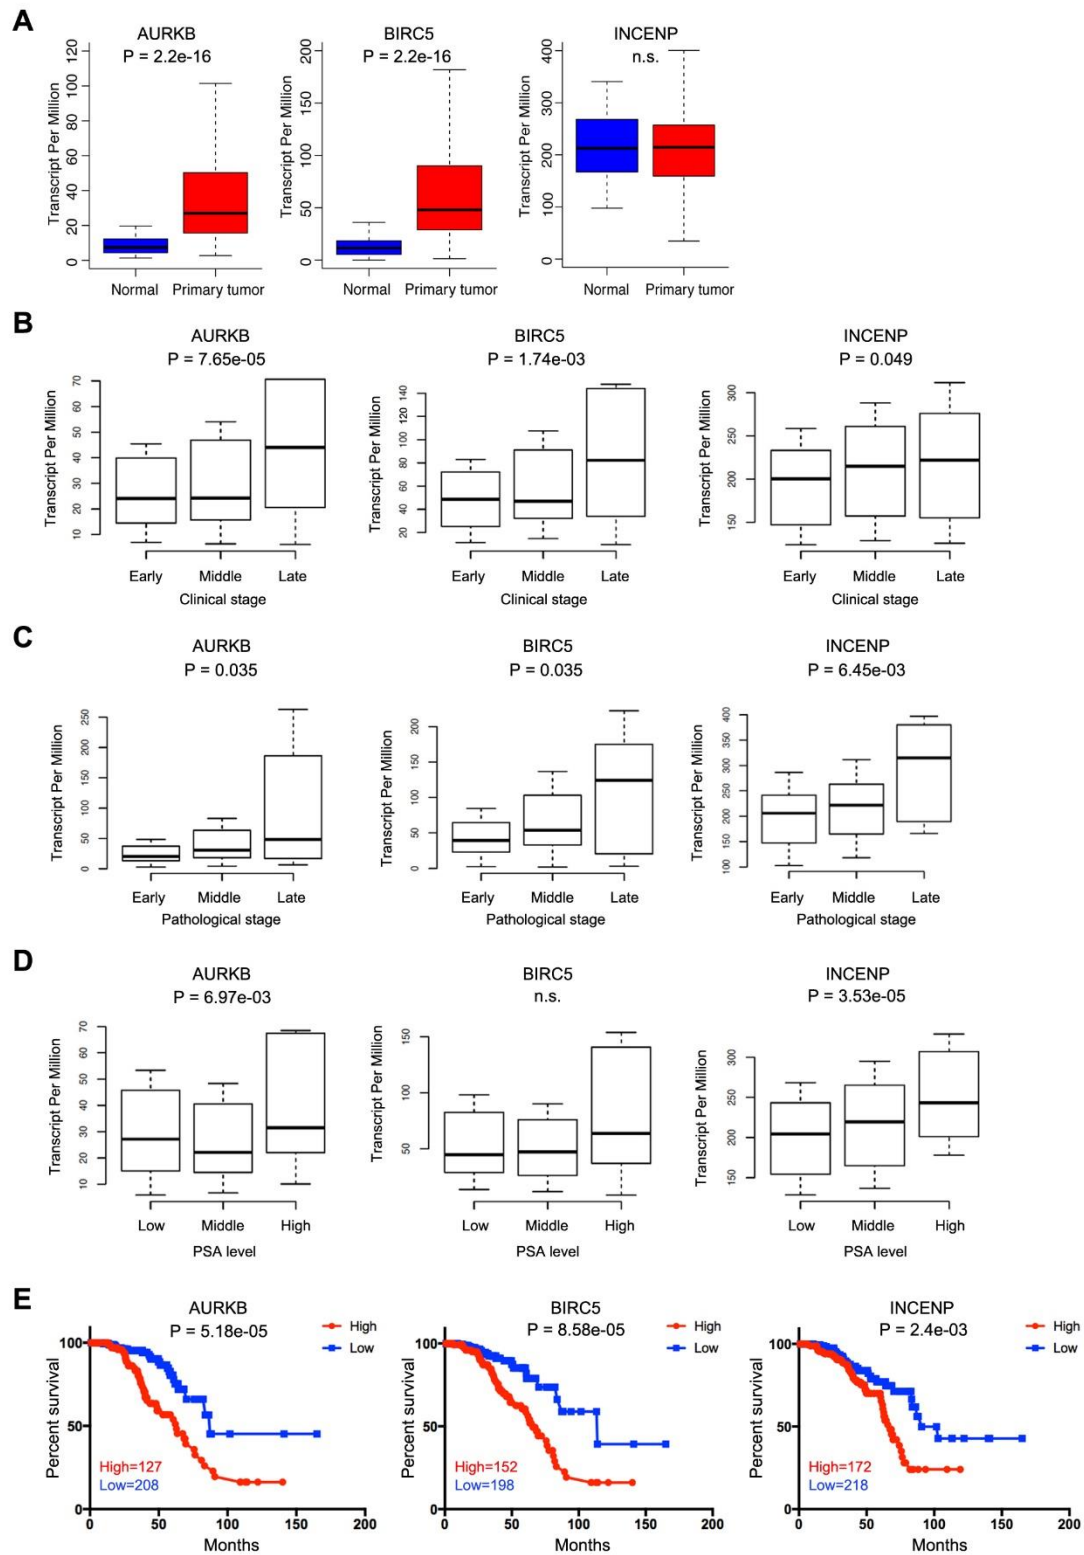

13

14 **Supplementary Figure 1. Dysregulation of CPC members other than CDCA8 in**  
 15 **PCa**

16 (A) Box plots showing the mRNA levels of AURKB, BIRC5 and INCENP in normal  
 17 (n=52) and PCa (n=497) specimens using data from TCGA.

18 **(B)** Box plots showing the mRNA levels of AURKB, BIRC5 and INCENP in PCa  
19 patients with different clinical stages ( $n_{\text{early}}=177$ ,  $n_{\text{middle}}=173$ ,  $n_{\text{late}}=53$ ) using data  
20 from TCGA.

21 **(C)** Box plots showing the mRNA levels of AURKB, BIRC5 and INCENP in PCa  
22 patients with different pathological stages ( $n_{\text{early}}=186$ ,  $n_{\text{middle}}=293$ ,  $n_{\text{late}}=10$ ) using  
23 data from TCGA.

24 **(D)** Box plots showing the mRNA levels of AURKB, BIRC5 and INCENP in PCa  
25 patients with different PSA levels ( $n_{\text{low}}=181$ ,  $n_{\text{middle}}=209$ ,  $n_{\text{high}}=48$ ) using data from  
26 TCGA.

27 **(E)** The association between AURKB, BIRC5 or INCENP expression and Disease-free  
28 survival time of PCa patients was analyzed by Kaplan-Meier analysis using data from  
29 TCGA.

30

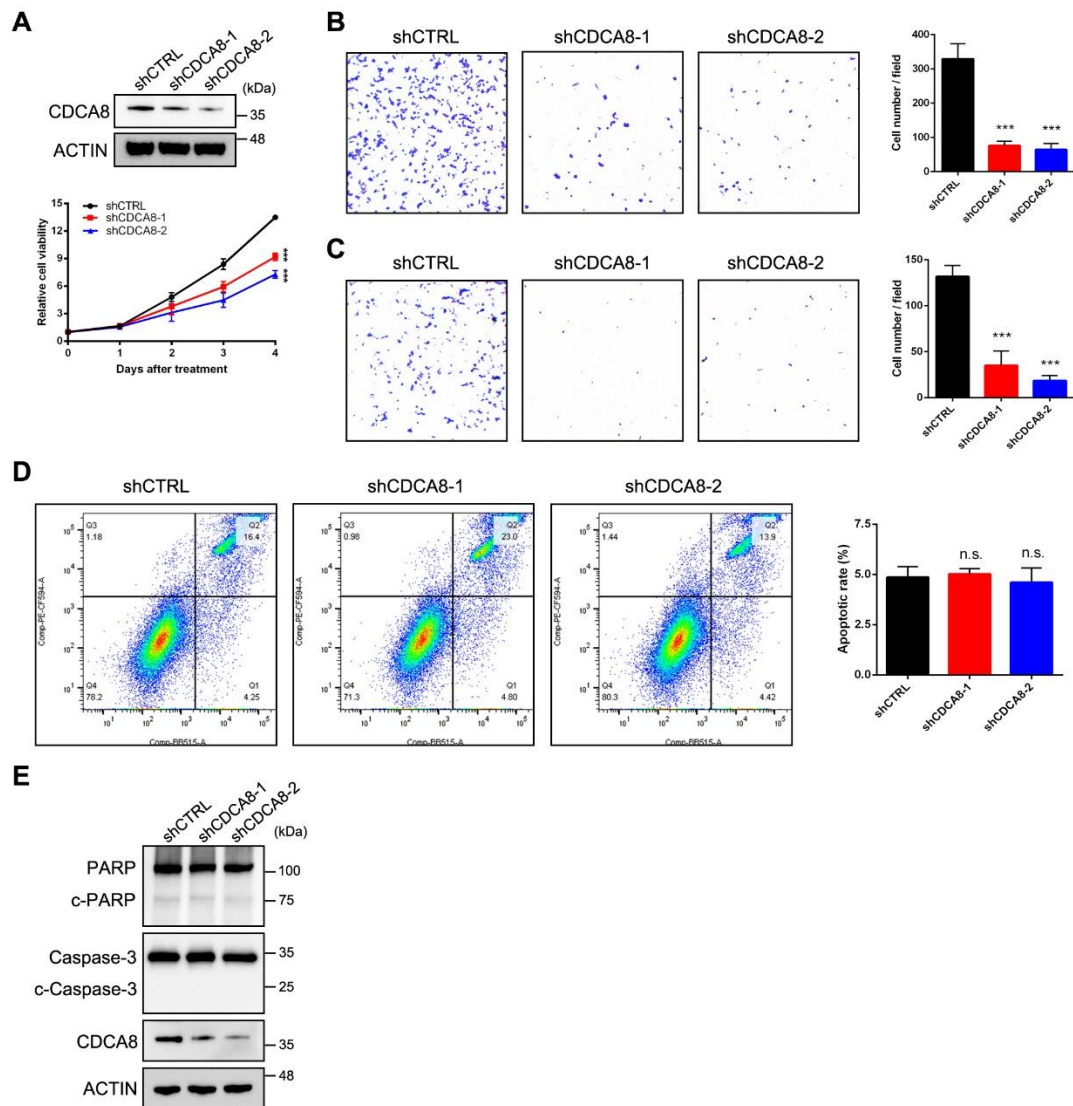

31

32 **Supplementary Figure 2. CDCA8 maintains the aggressiveness of PCa cells**

33 **(A)** Cell viability assay was used to assess the proliferative capacity of control and  
 34 CDCA8-deficient PC-3 cells. The knockdown efficiency of CDCA8 was validated by  
 35 western blot.

36 **(B)** Boyden chamber migration assay was performed to determine the migratory  
 37 capability of PC-3 cells after CDCA8 depletion. Graph showing the number of migrated  
 38 cells in the lower surface of filter at 24 h. Data represent Mean  $\pm$  SD from n=5 random  
 39 fields per filter.

40 **(C)** Boyden chamber invasion assay was performed to determine the invasive capability  
 41 of PC-3 cells after CDCA8 depletion. Graph showing the number of migrated cells  
 42 passing through Matrigel at 24 h. Data represent Mean  $\pm$  SD from n=5 random fields

43 per filter.

44 **(D)** Flow cytometry assays were performed to analyze the apoptotic rate in control and  
45 CDCA8-deficient C4-2 cells. Graph showing the percentage of apoptotic cells at each  
46 group.

47 **(E)** Western blot analysis of the protein levels of full-length and cleaved PARP or  
48 Caspase-3 in C4-2 cells upon CDCA8 knockdown.

49 \*,  $P < 0.05$ , \*\*,  $P < 0.01$ , \*\*\*,  $P < 0.001$  is based on the student's t-test unless otherwise  
50 stated. Values are mean  $\pm$  SD of three independent experiments.

51

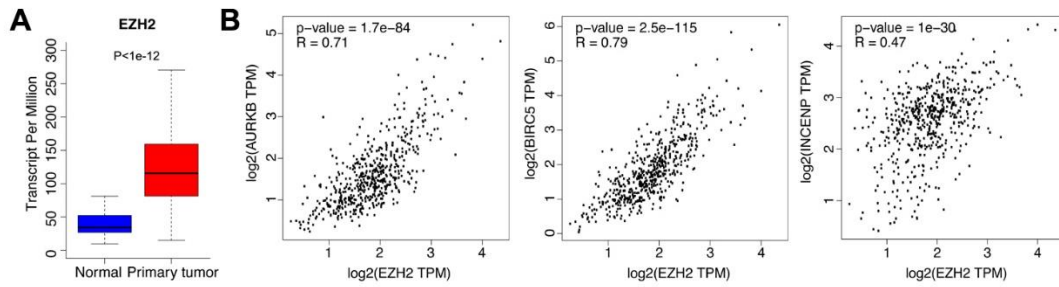

52

53 **Supplementary Figure 3. CPC members other than CDCA8 are positively**  
 54 **correlated with EZH2 in PCa**

55 **(A)** Box plot showing the mRNA level of EZH2 in normal (n=52) and PCa (n=497)  
 56 specimens using data from TCGA.

57 **(B)** Scatter plots showing the relationship between AURKB/BIRC5/INCENP and  
 58 EZH2 expressions using data from TCGA, with Spearman correlation coefficient (R)  
 59 and P values as indicated. TPM, transcript per million.

60

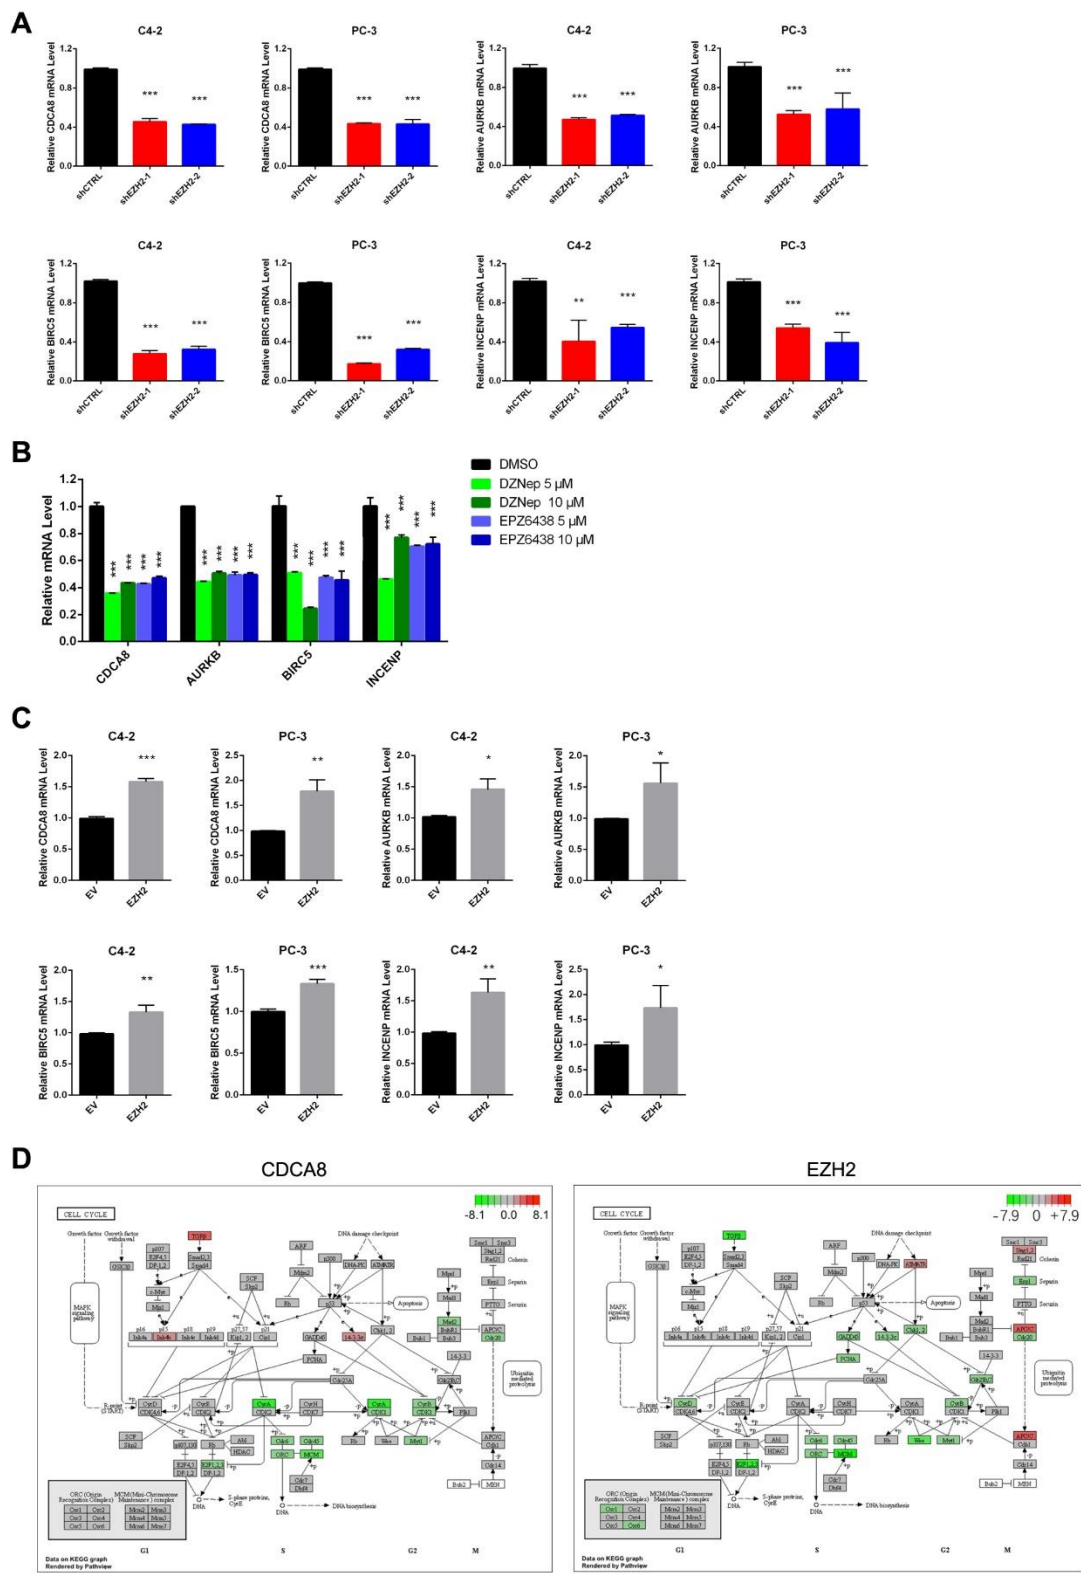

61

62 **Supplementary Figure 4. EZH2 regulates transcription of CDCA8 and other CPC**  
 63 **members**

64 (A) RT-qPCR analysis of the mRNA levels of CDCA8 and other CPC members in PCa  
 65 cell lines upon EZH2 knockdown.

66 **(B)** RT-qPCR analysis of the mRNA levels of CDCA8 and other CPC members in C4-  
67 2 cells after treatment of EZH2 inhibitors as indicated.

68 **(C)** RT-qPCR analysis of the mRNA levels of CDCA8 and other CPC members in PCa  
69 cell lines upon EZH2 overexpression.

70 **(D)** KEGG graphs showing the dysregulated genes in cell cycle pathway upon CDCA8  
71 knockdown or EZH2 knockdown in C4-2 cells.

72 \*, P < 0.05, \*\*, P < 0.01, \*\*\*, P < 0.001 is based on the student's t-test unless otherwise  
73 stated. Values are mean  $\pm$  SD of three independent experiments.

74



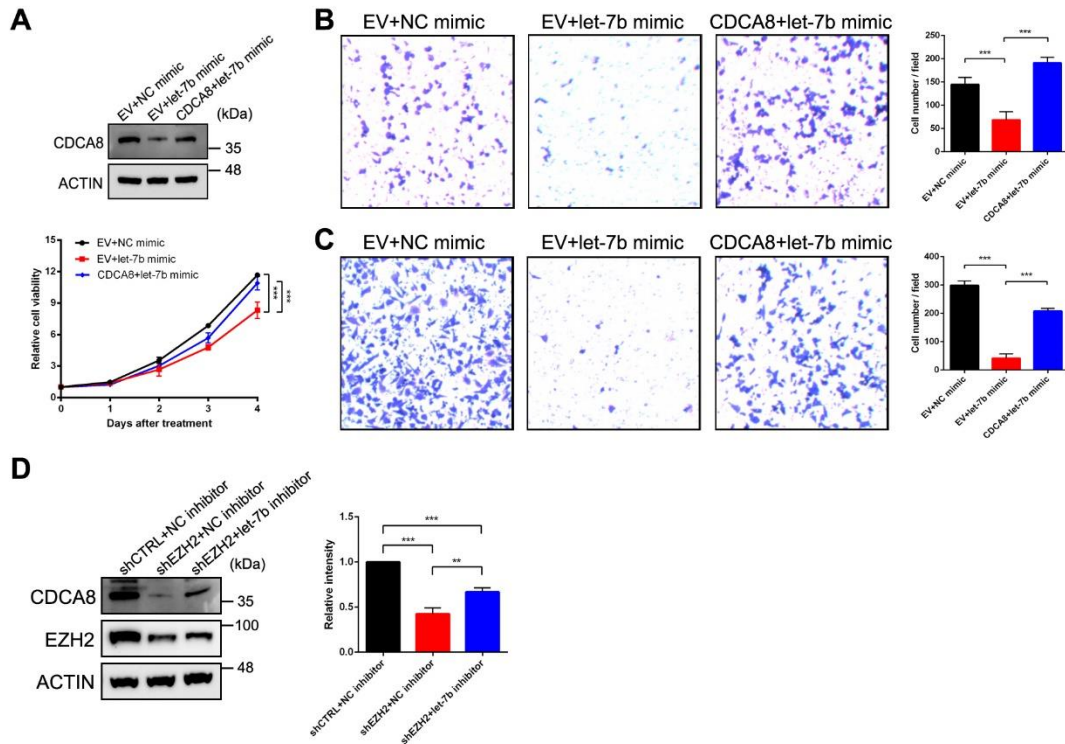

75

76 **Supplementary Figure 5. Repression of let-7b is partially responsible for the**  
 77 **EZH2-mediated CDCA8 upregulation in PCa**

78 **(A)** Cell viability assay showing that overexpression of CDCA8 could rescue the  
 79 decreased proliferation rate in C4-2 cells treated with let-7b mimics. The protein level  
 80 of CDCA8 in each group was detected by western blot. EV, empty vector.

81 **(B)** Boyden chamber migration assay showing that overexpression of CDCA8 could  
 82 rescue the decreased migration rate in C4-2 cells treated with let-7b mimics. Graph  
 83 showing the number of migrated cells in the lower surface of filter at 24 h. Data  
 84 represent Mean  $\pm$  SD from n=5 random fields per filter.

85 **(C)** Boyden chamber invasion assay showing that overexpression of CDCA8 could  
 86 rescue the decreased invasion rate in C4-2 cells treated with let-7b mimics. Graph  
 87 showing the number of migrated cells passing through Matrigel at 24 h. Data represent  
 88 Mean  $\pm$  SD from n=5 random fields per filter.

89 **(D)** Rescue assay showing that treatment of let-7b inhibitor could not fully restore the  
 90 downregulation of CDCA8 in EZH2-deficient PC-3 cells, as measured by western blot.  
 91 Graph represents the relative CDCA8 protein level in each group.

92 \*, P < 0.05, \*\*, P < 0.01, \*\*\*, P < 0.001 is based on the student's t-test unless otherwise

93 stated. Values are mean  $\pm$  SD of three independent experiments.

94

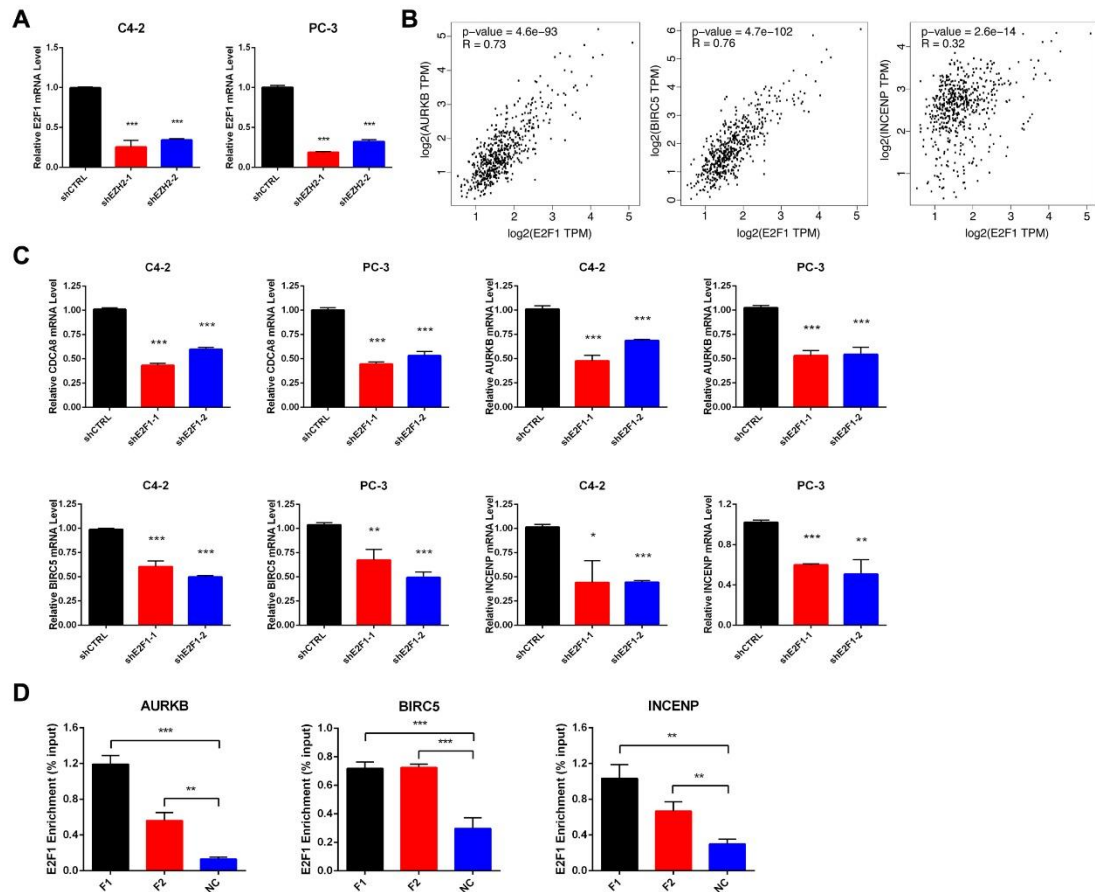

95

96

**Supplementary Figure 6. E2F1 activates transcription of CPC members other than CDCA8 in PCa**

97

98 **(A)** RT-qPCR analysis of the mRNA level of E2F1 in PCa cell lines upon EZH2  
99 knockdown.

100 **(B)** Scatter plot showing the relationship between AURKB/BIRC5/INCENP and E2F1  
101 expressions using data from TCGA, with Spearman correlation coefficient (R) and P  
102 value as indicated.

103 **(C)** RT-qPCR analysis of the mRNA levels of all CPC members in PCa cell lines upon  
104 E2F1 knockdown.

105 **(D)** ChIP-qPCR assay to monitor the enrichment of E2F1 at the promoter region of  
106 AURKB/BIRC5/INCENP in C4-2 cells. Two pairs of primers (F1 and F2) were used to  
107 amplify fragments inside AURKB/BIRC5/INCENP promoter region while another pair  
108 of primers (NC) targeting nearby region was used as negative control.  
109

110 **Supplementary Table 1. PCa TMA IHC data revealed correlation between**  
 111 **expressions of CDCA8 and EZH2**

|                             |                  |
|-----------------------------|------------------|
| Pearson r Correlation       |                  |
| CDCA8 vs. EZH2              |                  |
| Pearson r                   |                  |
| r                           | 0.8234           |
| 95% confidence interval     | 0.7569 to 0.8730 |
| R squared                   | 0.6779           |
| P value                     |                  |
| P (two-tailed)              | < 0.0001         |
| P value summary             | ****             |
| Significant? (alpha = 0.05) | Yes              |
| Number of XY Pairs          | 124              |

112

113

**Supplementary Table 4. Antibodies used in this study**

| <b>Target</b> | <b>Source</b>             | <b>Application (Dilution)</b>              |
|---------------|---------------------------|--------------------------------------------|
| CDCA8         | Abcam, Cat#ab74473        | IHC (1:50), WB (1:1000)                    |
| AURKB         | Sigma, Cat#MABE627        | WB (1:1000)                                |
| BIRC5         | Cell signaling, Cat#2808  | WB (1:1000)                                |
| INCENP        | Abcam, Cat#ab12183        | WB (1:1000)                                |
| EZH2          | Cell signaling, Cat#5246  | IHC (1:50), WB (1:1000), ChIP-qPCR (1:100) |
| E2F1          | Cell signaling, Cat#3742  | WB (1:1000), ChIP-qPCR (1:100)             |
| ACTIN         | Cell signaling, Cat#3700  | WB (1:1000)                                |
| GAPDH         | Cell signaling, Cat#5174  | WB (1:1000)                                |
| Histone H3    | Cell signaling, Cat#4499  | WB (1:1000)                                |
| H3K27me3      | Cell signaling, Cat#9733  | WB (1:1000), ChIP-qPCR (1:100)             |
| LC3A/B        | Cell signaling, Cat#12741 | WB (1:1000)                                |
| p62/SQSTM1    | Cell signaling, Cat#88588 | WB (1:1000)                                |
| PARP          | Cell signaling, Cat# 9532 | WB (1:1000)                                |
| Caspase-3     | Cell signaling, Cat#9662  | WB (1:1000)                                |

**Supplementary Table 5. Primers used in this study**

| <b>Name</b>            | <b>Sequence (5' to 3')</b>   | <b>Application</b> |
|------------------------|------------------------------|--------------------|
| GAPDH                  | F: GGAGCGAGATCCCTCCAAAAT     | RT-qPCR            |
|                        | R: GGCTGTTGTCATACTTCTCATGG   |                    |
| CDCA8                  | F: GAAGGGCAGTAGTCGGGTG       | RT-qPCR            |
|                        | R: TCACGGTCGAAGTCTTTCAGA     |                    |
| AURKB                  | F: CAGTGGGACACCCGACATC       | RT-qPCR            |
|                        | R: GTACACGTTTCCAACTTGCC      |                    |
| BIRC5                  | F: AGGACCACCGCATCTCTACAT     | RT-qPCR            |
|                        | R: AAGTCTGGCTCGTTCTCAGTG     |                    |
| INCENP                 | F: AAGTCATGGAGTTTCTCTGC      | RT-qPCR            |
|                        | R: CGTCTCTTCTCCGTCGGTTC      |                    |
| E2F1                   | F: ACGCTATGAGACCTCACTGAA     | RT-qPCR            |
|                        | R: TCCTGGGTCAACCCCTCAAG      |                    |
| let-7b promoter<br>-F1 | F: CCCCAGGAAGGTGGTAGCC       | ChIP-qPCR          |
|                        | R: GGACAGAGTGTAGCATGAGGATGA  |                    |
| let-7b promoter<br>-F2 | F: GTGACAGCGTCGCAAATG        | ChIP-qPCR          |
|                        | R: GCAGGAAACCACCAACCAG       |                    |
| let-7b promoter<br>-NC | F: ACGGGGCAGCCACCAA          | ChIP-qPCR          |
|                        | R: TGAGGGAGGACGGAAGGAC       |                    |
| CDCA8 promoter<br>-F1  | F: AGCAGAATCCTACAGCCGACC     | ChIP-qPCR          |
|                        | R: GCGAACTATACAACTACTACTCCCG |                    |
| CDCA8 promoter<br>-F1  | F: CGCATTGGGCGGAAGA          | ChIP-qPCR          |
|                        | R: CCCGAGACAAGGGCTGAG        |                    |
| CDCA8 promoter<br>-NC  | F: CAAGACCCGTGTGCGAGC        | ChIP-qPCR          |
|                        | R: TGTTGATTACATCAGGGAGCGT    |                    |
| AURKB promoter<br>-F1  | F: TCAGAGGGTCCGTTGGGC        | ChIP-qPCR          |
|                        | R: CCGTGAGAAGCAGAGAAAAAGAG   |                    |
| AURKB promoter         | F: CTAAACTGGAAGCCAAGCGTG     | ChIP-qPCR          |

|                 |                            |           |
|-----------------|----------------------------|-----------|
| -F2             | R: TCCAAGGCACTGCTACTCTCC   |           |
| AURKB promoter  | F: TGCCTCCCAGGTTCAAGC      | ChIP-qPCR |
| -NC             | R: GCCAACACAGTGAAACCCC     |           |
| BIRC5 promoter  | F: ACTCAAGTGATGCTCCTGCCT   | ChIP-qPCR |
| -F1             | R: CGACTGCTTTCAAAGAACGC    |           |
| BIRC5 promoter  | F: AGGACTTACTGTTGGTGGGACG  | ChIP-qPCR |
| -F2             | R: TGACTGCACGACCTGGGTTT    |           |
| BIRC5 promoter  | F: TGGCAGCCCCACACAGA       | ChIP-qPCR |
| -NC             | R: AAGGAAAGCATGAGCACGACT   |           |
| INCENP promoter | F: TTGGTTGGGAAGTGTGGACTT   | ChIP-qPCR |
| -F1             | R: GGGGTCTGGGGCTTTCTC      |           |
| INCENP promoter | F: GTGTTTTCTCTTGCTCAATGCTT | ChIP-qPCR |
| -F2             | R: CCTCCCACAACCCTCTCCC     |           |
| INCENP promoter | F: CCTCATCTGGCGATTGTGTC    | ChIP-qPCR |
| -NC             | R: TGTAAGCAAGTAGGTTGGGTCA  |           |
| E2F1 promoter   | F: CGCCGTTGTTCCCGTCA       | ChIP-qPCR |
| -F1             | R: CGCCGCTGCCTGCAAAGT      |           |
| E2F1 promoter   | F: GCCTATGTTCCGGTGTCCC     | ChIP-qPCR |
| -F2             | R: GCGGCGGTTCCCTATTGG      |           |
| E2F1 promoter   | F: AGACGGGGAGCATCACAGG     | ChIP-qPCR |
| -NC             | R: CCCTCATCCCTCACCACAGA    |           |
